# Supplementary material for: Antimicrobial Peptides and Biomarkers Induced by Ultraviolet Irradiation Have the Potential to Reduce Endodontic Inflammation and Facilitate Tissue Healing
Source: MDPI journal article supplement (doi:10.3390/pharmaceutics14091979), 2022-09-19
Supplement: s1 [file s1]

**Supplementary Table S2.** Chemokines, cytokines, and biomarkers (CCBMs) expressed or secreted in cells, tissues, and tissue explants after irradiation with UVC, UVB, or UVA.

| Wavelength (nm)                     | CCBM         | Dose(s)                                               | Cells/tissues | Outcome (reference)                                                                                                                                                          |
|-------------------------------------|--------------|-------------------------------------------------------|---------------|------------------------------------------------------------------------------------------------------------------------------------------------------------------------------|
| <b>UVC spectrum (200 to 290 nm)</b> |              |                                                       |               |                                                                                                                                                                              |
| 255 / 405                           | FGF1         | 9.28 mJ/cm <sup>2</sup> /<br>17.88 mJ/cm <sup>2</sup> | Fibroblasts   | • Fibroblasts had increased levels of FGF-acidic secretion at 24 hours after exposure [6]                                                                                    |
| 255 / 405                           | FGF1         | 9.28 mJ/cm <sup>2</sup> /<br>17.88 mJ/cm <sup>2</sup> | HEPM cells    | • HEPM cells had decreased levels of FGF-acidic secretion at 48 hours after exposure [6]                                                                                     |
| 255 / 405                           | IL6          | 9.28 mJ/cm <sup>2</sup> /<br>17.88 mJ/cm <sup>2</sup> | Fibroblasts   | • Fibroblasts had increased levels of IL6 secretion at 24 and 48 hours after exposure [6]                                                                                    |
| 255 / 405                           | IL6          | 9.28 mJ/cm <sup>2</sup> /<br>17.88 mJ/cm <sup>2</sup> | HEPM cells    | • HEPM cells had increased levels of IL6 secretion at 24 hours after exposure [6]                                                                                            |
| 255 / 405                           | PIGF         | 9.28 mJ/cm <sup>2</sup> /<br>17.88 mJ/cm <sup>2</sup> | Fibroblasts   | • Fibroblasts had increased levels of PIGF secretion at 24 hours after exposure [6]                                                                                          |
| 255 / 405                           | PIGF         | 9.28 mJ/cm <sup>2</sup> /<br>17.88 mJ/cm <sup>2</sup> | HEPM cells    | • HEPM cells had decreased levels of PIGF secretion at 24 hours after exposure [6]                                                                                           |
| 255 / 405                           | TGFA         | 9.28 mJ/cm <sup>2</sup> /<br>17.88 mJ/cm <sup>2</sup> | Fibroblasts   | • Fibroblasts had increased levels of TGFA secretion at 48 hours after exposure [6]                                                                                          |
| 255 / 405                           | TNF $\alpha$ | 9.28 mJ/cm <sup>2</sup> /<br>17.88 mJ/cm <sup>2</sup> | HEPM cells    | • HEPM cells had increased levels of TNFA secretion at 48 hours after exposure [6]                                                                                           |
| 255 / 405                           | VEGF         | 9.28 mJ/cm <sup>2</sup> /<br>17.88 mJ/cm <sup>2</sup> | Fibroblasts   | • Fibroblasts had decreased levels of VEGF secretion at 24 hours after exposure [6]                                                                                          |
| 255 / 405                           | VEGF         | 9.28 mJ/cm <sup>2</sup> /<br>17.88 mJ/cm <sup>2</sup> | HEPM cells    | • HEPM cells had decreased levels of VEGF secretion at 24 hours after exposure [6]                                                                                           |
| 254                                 | FGF          | 15-60 mJ/cm <sup>2</sup>                              | Skin          | • Epidermal wounds in rats had increased levels of FGF expression [56]                                                                                                       |
| 254                                 | FN1          |                                                       | Fibroblasts   | • Human fibroblasts had increased levels of fibronectin secretion and collagen lattices contain treated fibroblasts contracted faster at 7 days [12]                         |
| 254                                 | TGFB         | 15-60 mJ/cm <sup>2</sup>                              | Skin          | • Epidermal wounds in rats had increased levels of TGFB mRNA expression and secretion at 7 (15 mJ/cm <sup>2</sup> ) and 21 (60 mJ/cm <sup>2</sup> ) days after exposure [57] |
| 255                                 | BMP10        | 9.28 mJ/cm <sup>2</sup>                               | HEPM cells    | • HEPM cells had decreased levels of BMP-10 secretion at 48 hours after exposure [6]                                                                                         |

|                                     |       |                          |                   |                                                                                                                                                                           |
|-------------------------------------|-------|--------------------------|-------------------|---------------------------------------------------------------------------------------------------------------------------------------------------------------------------|
| 255                                 | FGF1  | 9.28 mJ/cm <sup>2</sup>  | HEPM cells        | <ul style="list-style-type: none"> <li>HEPM cells had decreased levels of FGF-acidic secretion at 24 hours after exposure [6]</li> </ul>                                  |
| 255                                 | IL6   | 9.28 mJ/cm <sup>2</sup>  | Fibroblasts       | <ul style="list-style-type: none"> <li>Fibroblasts had increased levels of IL6 secretion at 24 and 48 hours after exposure [6]</li> </ul>                                 |
| 255                                 | IL6   | 9.28 mJ/cm <sup>2</sup>  | HEPM cells        | <ul style="list-style-type: none"> <li>HEPM cells had increased levels of IL6 secretion at 24 and 48 hours after exposure [6]</li> </ul>                                  |
| 255                                 | PIGF  | 9.28 mJ/cm <sup>2</sup>  | Fibroblasts       | <ul style="list-style-type: none"> <li>Fibroblasts had increased levels of PIGF secretion at 24 hours after exposure [6]</li> </ul>                                       |
| 255                                 | TGFA  | 9.28 mJ/cm <sup>2</sup>  | Fibroblasts       | <ul style="list-style-type: none"> <li>Fibroblasts had increased levels of TGFA secretion at 24 hours after exposure [6]</li> </ul>                                       |
| 255                                 | VEGF  | 9.28 mJ/cm <sup>2</sup>  | Fibroblasts       | <ul style="list-style-type: none"> <li>Fibroblasts had decreased levels of VEGF secretion at 24 hours after exposure [6]</li> </ul>                                       |
| 255                                 | VEGF  | 9.28 mJ/cm <sup>2</sup>  | HEPM cells        | <ul style="list-style-type: none"> <li>HEPM cells had increased levels of VEGF secretion at 24 hours after exposure [6]</li> </ul>                                        |
| 200-320 a                           | CSF   | 300 J/m <sup>2</sup>     | Keratinocytes     | <ul style="list-style-type: none"> <li>Murine PAM212 cells had increased levels of GM-CSF mRNA expression and secretion as early as 1 hour after exposure [58]</li> </ul> |
| 200-320 a                           | IL3   | 300 J/m <sup>2</sup>     | Keratinocytes     | <ul style="list-style-type: none"> <li>Murine PAM212 cells had increased levels of IL3 mRNA expression as early as at 1 hour after exposure [58]</li> </ul>               |
| <b>UVB Spectrum (290 to 320 nm)</b> |       |                          |                   |                                                                                                                                                                           |
| 250-400 i                           | IL6   | 100 J/m <sup>2</sup>     | Keratinocytes     | <ul style="list-style-type: none"> <li>Human epidermal cells had increased levels of IL6 mRNA expression and secretion at 24 hours after exposure [59]</li> </ul>         |
| 250-360 h                           | IL3   | 120-400 J/m <sup>2</sup> | Keratinocytes     | <ul style="list-style-type: none"> <li>Murine PAM 212 cells had increased levels of IL3 expression and secretion after exposure [60]</li> </ul>                           |
| 280-315                             | IL6   | 250-500 J/m <sup>2</sup> | Keratinocytes     | <ul style="list-style-type: none"> <li>NHEK had increased levels of IL6 expression and secretion at 24 hours after exposure [61]</li> </ul>                               |
| 280-315                             | TNFA  | 250-500 J/m <sup>2</sup> | Keratinocytes     | <ul style="list-style-type: none"> <li>NHEK had increased levels of TNF<math>\alpha</math> expression and secretion at 24 hours after exposure [61]</li> </ul>            |
| 280-320                             | VEGF  | 30-60 mJ/cm <sup>2</sup> | Skin              | <ul style="list-style-type: none"> <li>Biopsies from human and murine skin had increased levels of VEGF immunostaining at 48 hours after exposure [26]</li> </ul>         |
| 301-312 k                           | ICAM1 | 100 mJ/cm <sup>2</sup>   | Endothelial cells | <ul style="list-style-type: none"> <li>Human dermal microvascular endothelial cell (HDMEC) had increased levels of</li> </ul>                                             |

|       |       |                            |                   |                                                                                                                                                                                                                                       |
|-------|-------|----------------------------|-------------------|---------------------------------------------------------------------------------------------------------------------------------------------------------------------------------------------------------------------------------------|
|       |       |                            |                   | ICAM-1 expression at 24 hours after exposure [62]                                                                                                                                                                                     |
| 305 e | IL1   | 0.1 J/cm <sup>2</sup>      | Keratinocytes     | <ul style="list-style-type: none"> <li>Human keratinocytes had increased levels of IL1 secretion at 4 days after exposure [25]</li> </ul>                                                                                             |
| 310   | IL1   | 100-800 mJ/cm <sup>2</sup> | Keratinocytes     | <ul style="list-style-type: none"> <li>Human squamous cell carcinoma, murine Pam 212, and murine epidermal cell keratinocytes had increased levels of IL1 mRNA expression and secretion at 24 hours after exposure [63–65]</li> </ul> |
| 310 g | IL1   | 184 mJ/cm <sup>2</sup>     | Skin              | <ul style="list-style-type: none"> <li>Biopsies from human skin had increased levels of IL1 immunostaining at 24 hours after exposure [27]</li> </ul>                                                                                 |
| 310 g | TNFA  | 184 mJ/cm <sup>2</sup>     | Skin              | <ul style="list-style-type: none"> <li>Biopsies from human skin had increased levels of TNF immunostaining at 24 hours after exposure [27]</li> </ul>                                                                                 |
| 310 j | SELE  | 2.5 MED                    | Skin              | <ul style="list-style-type: none"> <li>Biopsies from human skin had increased levels of E-selectin immunostaining at 4, 8, 24 hours after exposure [27]</li> </ul>                                                                    |
| 310 j | ICAM1 | 15-20 mJ/cm <sup>2</sup>   | Endothelial cells | <ul style="list-style-type: none"> <li>Human dermal microvascular endothelial cell (HMEC-1) line had increased levels of ICAM-1 staining expression at 24 hours after exposure [66]</li> </ul>                                        |
| 310 j | ICAM1 | 2.5 MED                    | Skin              | <ul style="list-style-type: none"> <li>Biopsies from human skin had increased levels of ICAM-1 immunostaining at 4, 8, 24 hours after exposure [27]</li> </ul>                                                                        |
| 312   | CCL2  | 2 MED                      | Skin              | <ul style="list-style-type: none"> <li>Biopsies from human skin had increased levels of CCL2 mRNA expression at 24 hours after exposure [28]</li> </ul>                                                                               |
| 312   | CCL20 | 2 MED                      | Skin              | <ul style="list-style-type: none"> <li>Biopsies from human skin had increased levels of CCL20 mRNA expression at 24 hours after exposure [28,67]</li> </ul>                                                                           |
| 312   | CXCL1 | 2 MED                      | Skin              | <ul style="list-style-type: none"> <li>Biopsies from human skin had increased levels of CXCL1 mRNA expression at 24 hours after exposure [28]</li> </ul>                                                                              |
| 312   | CXCL8 | 2 MED                      | Skin              | <ul style="list-style-type: none"> <li>Biopsies from human skin had increased levels of IL8 mRNA expression at 24 hours after exposure [28]</li> </ul>                                                                                |
| 312   | IL10  | 2 MED                      | Skin              | <ul style="list-style-type: none"> <li>Biopsies from human skin had increased levels of IL10 mRNA expression at 24 hours after exposure [28]</li> </ul>                                                                               |
| 313 b | IL6   | 10-100 J/cm <sup>2</sup>   | Keratinocytes     | <ul style="list-style-type: none"> <li>Normal and malignant human keratinocytes had increased levels of IL6 mRNA</li> </ul>                                                                                                           |

|                                     |       |                           |               |                                                                                                                                                                                                                          |
|-------------------------------------|-------|---------------------------|---------------|--------------------------------------------------------------------------------------------------------------------------------------------------------------------------------------------------------------------------|
|                                     |       |                           |               | expression and secretion at 24 hours after exposure [68]                                                                                                                                                                 |
| 313 f                               | TNFA  | 200-750 J/m <sup>2</sup>  | Keratinocytes | <ul style="list-style-type: none"> <li>Human HaCaT cells had increased levels of TNFA secretion at 24 hours after exposure [69]</li> </ul>                                                                               |
| 313 f                               | TNFA  | 200-750 J/m <sup>2</sup>  | Skin          | <ul style="list-style-type: none"> <li>Murine epidermis and dermis had increased levels of TNFA expression at 12 hours after exposure [69]</li> </ul>                                                                    |
| NB-UVB                              | SMAD3 | 1.5-1.8 J/cm <sup>2</sup> | Skin          | <ul style="list-style-type: none"> <li>Biopsies from skin of individuals with atopic dermatitis had increased levels of Smad3 mRNA expression at 12 hours after exposure [70]</li> </ul>                                 |
| NB-UVB                              | SMAD4 | 1.5-1.8 J/cm <sup>2</sup> | Skin          | <ul style="list-style-type: none"> <li>Biopsies from skin of individuals with atopic dermatitis had increased levels of Smad4 mRNA expression at 12 hours after exposure [70]</li> </ul>                                 |
| NB-UVB                              | TGFB  | 1.5-1.8 J/cm <sup>2</sup> | Skin          | <ul style="list-style-type: none"> <li>Biopsies from skin of individuals with atopic dermatitis had increased levels of TGFB mRNA expression at 12 hours after exposure [70]</li> </ul>                                  |
| UVB                                 | TGFA  | 3 MED                     | Skin          | <ul style="list-style-type: none"> <li>Cutaneous exudates from human skin abrasions had increased levels of TGFA in irradiated sites at 30 minutes after exposure [71]</li> </ul>                                        |
| <b>UVA spectrum (320 to 400 nm)</b> |       |                           |               |                                                                                                                                                                                                                          |
| 340-400                             | CXCL8 | 20 J/m <sup>2</sup>       | Skin          | <ul style="list-style-type: none"> <li>Sclerotic skin biopsies had increased levels of IL8 mRNA expression (20 J/m<sup>2</sup>, cumulative 800 J/m<sup>2</sup> total) that decreased after irradiation [22]</li> </ul>   |
| 340-400                             | IL6   | 20 J/m <sup>2</sup>       | Skin          | <ul style="list-style-type: none"> <li>Sclerotic skin biopsies had increased levels of IL6 mRNA expression (20 J/m<sup>2</sup>, cumulative 800 J/m<sup>2</sup> total) that decreased after irradiation [22]</li> </ul>   |
| 360 c                               | CSF   | 1-10 J/cm <sup>2</sup>    | Keratinocytes | <ul style="list-style-type: none"> <li>Human HaCaT keratinocytes had increased levels of GM-CSF mRNA expression and secretion at 24 and 48 hours after exposure through an IL1 alpha independent pathway [24]</li> </ul> |
| 365 d                               | CSF   | 1 J/cm <sup>2</sup>       | Keratinocytes | <ul style="list-style-type: none"> <li>Human keratinocytes had increased levels of GM-CSF secretion at 4 days after exposure [25]</li> </ul>                                                                             |

|       |      |                          |               |                                                                                                                                           |
|-------|------|--------------------------|---------------|-------------------------------------------------------------------------------------------------------------------------------------------|
| 365 d | IL6  | 1 J/cm <sup>2</sup>      | Keratinocytes | <ul style="list-style-type: none"> <li>Human keratinocytes had increased levels of IL6 secretion at 4 days after exposure [25]</li> </ul> |
| 365 d | IL8  | 1 J/cm <sup>2</sup>      | Keratinocytes | <ul style="list-style-type: none"> <li>Human keratinocytes had increased levels of IL8 secretion at 4 days after exposure [25]</li> </ul> |
| 405   | FGF1 | 17.88 mJ/cm <sup>2</sup> | Fibroblasts   | <ul style="list-style-type: none"> <li>Fibroblasts had decreased levels of FGF-acidic secretion at 24 hours after exposure [6]</li> </ul> |

<sup>a</sup>UV range from 290 to 320 nm

<sup>b</sup>UV range from 290 to 320 nm, emission peak at 313 nm

<sup>c</sup>UV range from 330 to 460 nm, emission peak at 360 nm

<sup>d</sup>UV range from 310 to 400 nm, emission peak at 365 nm

<sup>e</sup>UV range from 295 to 315 nm, emission peak at 305 nm

<sup>f</sup>UV range from 290 to 320 nm, emission peak at 313 nm

<sup>g</sup>UV range from 270 to 380 nm, emission peak at 310 nm

<sup>h</sup>UV range from 250 to 360 nm; 65% in range of 280 to 315 nm (UVB); remaining in range of 250 to 280 nm (UVC) and in range of 315 to 360 nm (UVA)

<sup>i</sup>UV range from 250 to 400 nm

<sup>j</sup>UV range from 270 to 400 nm, emission peak at 310 nm; 43.3% in range of 290 to 320 nm (UVB); <0.1% in range of 200-290 nm (UVC); and 56.6% in range of 320-400 nm (UVA)

<sup>k</sup>UV range of 290 to 325 nm, emission peaks at 301 and 312 nm

MED, minimum erythema dose
