# Supplementary material for: Antimicrobial Peptides and Biomarkers Induced by Ultraviolet Irradiation Have the Potential to Reduce Endodontic Inflammation and Facilitate Tissue Healing
Source: MDPI journal article supplement (doi:10.3390/pharmaceutics14091979), 2022-09-19
Supplement: s1 [file s1]

**Supplementary Table S1.** Antimicrobial peptides (AMPs) expressed or secreted in cells, tissues, and tissue explants after irradiation with UVC, UVB, or UVA.

| Wavelength (nm)                     | AMP      | Dose(s)                      | Cells/tissues | Outcome (reference)                                                                                                                                                                            |
|-------------------------------------|----------|------------------------------|---------------|------------------------------------------------------------------------------------------------------------------------------------------------------------------------------------------------|
| <b>UVC spectrum (200 to 290 nm)</b> |          |                              |               |                                                                                                                                                                                                |
| 280-315                             | CAMP     | 12-40 mJ/cm <sup>2</sup>     | Skin          | <ul style="list-style-type: none"> <li>Biopsies from human skin had increased levels of hCAP18/LL37 mRNA expression at 24-28 hours after exposure [20]</li> </ul>                              |
| <b>UVB Spectrum (290 to 320 nm)</b> |          |                              |               |                                                                                                                                                                                                |
| 311 <sup>a</sup>                    | CAMP     | 1.6 J/cm <sup>2b</sup>       | Skin          | <ul style="list-style-type: none"> <li>Biopsies from human atopic skin had no changes in levels of LL37 mRNA expression after exposure [23]</li> </ul>                                         |
| 311 <sup>a</sup>                    | DEFB1    | 1.6 J/cm <sup>2b</sup>       | Skin          | <ul style="list-style-type: none"> <li>Biopsies from human atopic skin had increased levels of HBD1 mRNA expression after exposure [23]</li> </ul>                                             |
| 311 <sup>a</sup>                    | DEFB103A | 1.6 J/cm <sup>2b</sup>       | Skin          | <ul style="list-style-type: none"> <li>Biopsies from human atopic skin had no changes in levels of HBD3 mRNA expression after exposure [23]</li> </ul>                                         |
| 311 <sup>a</sup>                    | DEFB4A   | 1.6 J/cm <sup>2b</sup>       | Skin          | <ul style="list-style-type: none"> <li>Biopsies from human atopic skin had decreased levels of HBD2 mRNA expression after exposure [23]</li> </ul>                                             |
| 312                                 | DEFB4A   | 2 MED                        | Skin          | <ul style="list-style-type: none"> <li>Biopsies from human skin had increased levels of HBD2 expression (IHC) at 24 hours after exposure [28]</li> </ul>                                       |
| 312                                 | PI3      | 2 MED                        | Skin          | <ul style="list-style-type: none"> <li>Biopsies from human skin had increased levels of elafin expression (IHC) at 24 hours after exposure [28]</li> </ul>                                     |
| 312                                 | S100A12  | 2 MED                        | Skin          | <ul style="list-style-type: none"> <li>Biopsies from human skin had increased levels of S100A12 expression (IHC) at 24 hours after exposure [28]</li> </ul>                                    |
| 312                                 | S100A7   | 2 MED                        | Skin          | <ul style="list-style-type: none"> <li>Biopsies from human skin had increased levels of S100A7 expression (IHC) at 24 hours after exposure [28]</li> </ul>                                     |
| 312                                 | S100A8/9 | 2 MED                        | Skin          | <ul style="list-style-type: none"> <li>Biopsies from human skin had increased levels of S100A8/9 expression (IHC) at 24 hours after exposure [28]</li> </ul>                                   |
| 313 <sup>c</sup>                    | DEFB103A | 0, 150, 350 J/m <sup>2</sup> | Keratinocytes | <ul style="list-style-type: none"> <li>Human keratinocytes had increased levels of HBD3 mRNA expression and secretion at 350 J/m<sup>2</sup> in 24 and 48 hours after exposure [21]</li> </ul> |

|                  |          |                              |               |                                                                                                                                                                                                                         |
|------------------|----------|------------------------------|---------------|-------------------------------------------------------------------------------------------------------------------------------------------------------------------------------------------------------------------------|
| 313 <sup>c</sup> | DEFB103A | 3 X 1 MED <sup>d</sup>       | Skin          | <ul style="list-style-type: none"> <li>Biopsies from human skin had increased levels of HBD3 expression (IHC) in 3/3 individuals and present in skin washing fluids (ELISA) at days 1 and 6 [21]</li> </ul>             |
| 313 <sup>c</sup> | DEFB103A | 250 J/m <sup>2</sup>         | Skin explants | <ul style="list-style-type: none"> <li>Human skin explants had increased HBD3 expression (IHC) at 24 hours after exposure [21]</li> </ul>                                                                               |
| 313 <sup>c</sup> | DEFB4A   | 0, 150, 350 J/m <sup>2</sup> | Keratinocytes | <ul style="list-style-type: none"> <li>Human keratinocytes had increased levels of HBD2 mRNA expression and secretion at 350 J/m<sup>2</sup> in 24 and 48 hours after exposure [21]</li> </ul>                          |
| 313 <sup>c</sup> | DEFB4A   | 3 X 1 MED <sup>d</sup>       | Skin          | <ul style="list-style-type: none"> <li>Biopsies from human skin had increased levels of HBD2 expression (IHC) in 1/3 individuals, but low concentrations in skin washing fluids (ELISA) at days 1 and 6 [21]</li> </ul> |
| 313 <sup>c</sup> | DEFB4A   | 250 J/m <sup>2</sup>         | Skin explants | <ul style="list-style-type: none"> <li>Human skin explants had minimal HBD2 expression (IHC) at 24 hours after exposure [21]</li> </ul>                                                                                 |
| 313 <sup>c</sup> | RNASE7   | 0, 150, 350 J/m <sup>2</sup> | Keratinocytes | <ul style="list-style-type: none"> <li>Human keratinocytes had increased levels of RNase7 mRNA expression and secretion at 350 J/m<sup>2</sup> in 24 and 48 hours after exposure [21]</li> </ul>                        |
| 313 <sup>c</sup> | RNASE7   | 3 X 1 MED <sup>d</sup>       | Skin          | <ul style="list-style-type: none"> <li>Biopsies from human skin had increased levels of RNase7 expression (IHC) in 3/3 individuals and present in skin washing fluids (ELISA) at days 1 and 6 [21]</li> </ul>           |
| 313 <sup>c</sup> | RNASE7   | 250 J/m <sup>2</sup>         | Skin explants | <ul style="list-style-type: none"> <li>Human skin explants had increased RNase7 expression in skin explants (IHC) at 24 hours after exposure [21]</li> </ul>                                                            |
| 313 <sup>c</sup> | S100A7   | 0, 150, 350 J/m <sup>2</sup> | Keratinocytes | <ul style="list-style-type: none"> <li>Human keratinocytes had increased levels of psoriasin mRNA expression and secretion at 350 J/m<sup>2</sup> in 24 and 48 hours after exposure [21]</li> </ul>                     |
| 313 <sup>c</sup> | S100A7   | 3 X 1 MED <sup>d</sup>       | Skin          | <ul style="list-style-type: none"> <li>Biopsies from human skin had increased levels of psoriasin (IHC) in 3/3 individuals and present in skin washing fluids (ELISA) at days 1 and 6 [21]</li> </ul>                   |
| 313 <sup>c</sup> | S100A7   | 250 J/m <sup>2</sup>         | Skin explants | <ul style="list-style-type: none"> <li>Human skin explants had increased levels of psoriasin expression (IHC) at 24 hours after exposure [21]</li> </ul>                                                                |
| 313 <sup>e</sup> | DEFB1    | 30, 100 mJ/cm <sup>2</sup>   | Keratinocytes | <ul style="list-style-type: none"> <li>Neonatal foreskin, HaCaT, and A431 keratinocytes all had increased levels of HBD1 mRNA expression at 12 hours after exposure [55]</li> </ul>                                     |
| 313 <sup>e</sup> | DEFB4A   | 30, 100 mJ/cm <sup>2</sup>   | Keratinocytes | <ul style="list-style-type: none"> <li>Neonatal foreskin, HaCaT, and A431 keratinocytes all had increased levels of HBD2 mRNA expression at 12 hours after exposure [55]</li> </ul>                                     |

**UVA spectrum (320 to 400 nm)**

|         |          |                       |      |                                                                                                                                                                                                                        |
|---------|----------|-----------------------|------|------------------------------------------------------------------------------------------------------------------------------------------------------------------------------------------------------------------------|
| 340-400 | CAMP     | 20 J/m <sup>2 f</sup> | Skin | <ul style="list-style-type: none"> <li>• Biopsies from human skin did not have changes in hCAP18 mRNA expression after exposure [23]</li> </ul>                                                                        |
| 340-400 | DEFB1    | 20 J/m <sup>2 f</sup> | Skin | <ul style="list-style-type: none"> <li>• Biopsies from human sclerotic skin had decreased levels of HBD1 mRNA expression at 20 J/m<sup>2</sup> (800 J/m<sup>2</sup> total), but not in unaffected skin [22]</li> </ul> |
| 340-400 | DEFB103A | 20 J/m <sup>2 f</sup> | Skin | <ul style="list-style-type: none"> <li>• Biopsies from human sclerotic skin had decreased levels of HBD3 mRNA expression at 20 J/m<sup>2</sup> (800 J/m<sup>2</sup> total), but not in unaffected skin [22]</li> </ul> |

<sup>a</sup>UV range from 310 to 315 nm, emission peak at 311 nm

<sup>b</sup>Dose of 0.1 to 0.2 J/cm<sup>2</sup> per each of 6 sessions, 1.6 J/cm<sup>2</sup> total

<sup>c</sup>UV range from 290 to 320 nm, emission peak at 313 nm

<sup>d</sup>UV irradiated on 3 consecutive days with 1 MED

<sup>e</sup>UV range from 280 to 320 nm, emission peak at 313 nm

<sup>f</sup>Dose of 20 J/cm<sup>2</sup> per each of 40 sessions, 800 J/cm<sup>2</sup> total

ELISA, enzyme-linked immunosorbent assay

FACS, fluorescence-activated cell sorting

IF, immunofluorescence

IHC, Immunohistochemistry

MED, minimal erythema dose
