# Supplementary material for: Antimicrobial Peptides and Biomarkers Induced by Ultraviolet Irradiation Have the Potential to Reduce Endodontic Inflammation and Facilitate Tissue Healing
Source: MDPI journal article supplement (doi:10.3390/pharmaceutics14091979), 2022-09-19
Supplement: s1 [file s1]

**Supplementary Table S4.** Antimicrobial peptides and biomarkers in the literature dataset (n=32) participating in the activation of innate and immune mechanisms as determined using IPA Diseases & Function annotations. Ingenuity Pathway Analysis (IPA, Qiagen, Germantown, MD) was used to assess whether the antimicrobial peptides and biomarkers in the literature dataset (n=32) would participate in the activation of innate and immune mechanisms. IPA Core Analysis was run on the list of 32 biomarkers and IPA Diseases & Function annotations were associated with cellular stress and injury (e.g., wound healing), cytokine signaling, growth factor signaling, intracellular and second messenger signaling, cellular growth, proliferation, and development, cellular immune response, and organismal growth and development.

| <b>Diseases &amp; Functions Annotation</b>           | <b>p-value</b> | <b>No. of molecules</b> | <b>Identification of molecules</b>                                                                                       |
|------------------------------------------------------|----------------|-------------------------|--------------------------------------------------------------------------------------------------------------------------|
| <b>Antimicrobial Response, Inflammatory Response</b> |                |                         |                                                                                                                          |
| Antibacterial response                               | 1.66E-22       | 13                      | CAMP, CCL20, DEFB1, DEFB103A/DEFB103B, DEFB4A/DEFB4B, IL10, IL6, RNASE7, S100A12, S100A7, S100A8, S100A9, TNF            |
| Antimicrobial response                               | 6.55E-19       | 14                      | CAMP, CCL20, DEFB1, DEFB103A/DEFB103B, DEFB4A/DEFB4B, IL10, IL6, RNASE7, S100A12, S100A7, S100A8, S100A9, TGFB1, TNF     |
| <b>Antimicrobial Response, Inflammatory Response</b> |                |                         |                                                                                                                          |
| Chemoattraction                                      | 5.09E-23       | 12                      | CAMP, CCL2, CCL20, CSF2, CXCL1, CXCL3, CXCL8, DEFB4A/DEFB4B, FN1, TGFB1, TNF, VEGFA                                      |
| Chemoattraction of leukocytes                        | 5.45E-21       | 10                      | CAMP, CCL2, CCL20, CSF2, CXCL1, CXCL3, CXCL8, DEFB4A/DEFB4B, TGFB1, TNF                                                  |
| Chemoattraction of phagocytes                        | 3.74E-17       | 8                       | CAMP, CCL2, CCL20, CXCL1, CXCL3, CXCL8, TGFB1, TNF                                                                       |
| Chemoattraction of granulocytes                      | 3.40E-16       | 7                       | CAMP, CCL2, CXCL1, CXCL3, CXCL8, TGFB1, TNF                                                                              |
| Chemoattraction of neutrophils                       | 2.60E-14       | 6                       | CAMP, CXCL1, CXCL3, CXCL8, TGFB1, TNF                                                                                    |
| <b>Cell Death and Survival</b>                       |                |                         |                                                                                                                          |
| Apoptosis of neutrophils                             | 5.50E-19       | 11                      | CAMP, CCL2, CSF2, CXCL1, CXCL2, CXCL8, DEFB103A/DEFB103B, IL10, IL6, TGFB1, TNF                                          |
| Cell viability of blood cells                        | 1.42E-16       | 13                      | CSF2, CXCL8, FGF2, FN1, ICAM1, IL10, IL6, SELE, SMAD3, SMAD4, TGFB1, TNF, VEGFA                                          |
| Cell rolling of leukocytes                           | 4.44E-16       | 9                       | CCL2, CXCL1, CXCL2, CXCL3, CXCL8, ICAM1, SELE, TNF, VEGFA                                                                |
| Cell death of immune cells                           | 1.07E-15       | 17                      | CAMP, CCL2, CSF2, CXCL1, CXCL2, CXCL8, DEFB103A/DEFB103B, FN1, ICAM1, IL10, IL6, S100A8, SMAD3, SMAD4, TGFB1, TNF, VEGFA |

|                                                                                                                                                                 |          |         |                                                                                                                                                                                             |
|-----------------------------------------------------------------------------------------------------------------------------------------------------------------|----------|---------|---------------------------------------------------------------------------------------------------------------------------------------------------------------------------------------------|
| Apoptosis of phagocytes                                                                                                                                         | 1.51E-15 | 12      | CAMP, CCL2, CSF2, CXCL1, CXCL2, CXCL8, DEFB103A/DEFB103B, IL10, IL6, S100A8, TGFB1, TNF                                                                                                     |
| Apoptosis of myeloid cells                                                                                                                                      | 1.95E-15 | 12      | CAMP, CCL2, CSF2, CXCL1, CXCL2, CXCL8, DEFB103A/DEFB103B, IL10, IL6, S100A8, TGFB1, TNF                                                                                                     |
| Apoptosis of blood cells                                                                                                                                        | 3.85E-15 | 15      | CAMP, CCL2, CSF2, CXCL1, CXCL2, CXCL8, DEFB103A/DEFB103B, IL10, IL6, S100A8, SMAD3, SMAD4, TGFB1, TNF, VEGFA                                                                                |
| Cell rolling of phagocytes                                                                                                                                      | 1.28E-14 | 7       | CCL2, CXCL1, CXCL2, CXCL3, ICAM1, SELE, TNF                                                                                                                                                 |
| Cell viability of myeloid cells                                                                                                                                 | 2.25E-14 | 9       | CSF2, CXCL8, FGF2, FN1, ICAM1, IL10, IL6, TGFB1, TNF                                                                                                                                        |
| Apoptosis of leukocytes                                                                                                                                         | 3.69E-14 | 14      | CAMP, CCL2, CSF2, CXCL1, CXCL2, CXCL8, DEFB103A/DEFB103B, IL10, IL6, S100A8, SMAD3, TGFB1, TNF, VEGFA                                                                                       |
| Cell rolling of granulocytes                                                                                                                                    | 3.83E-14 | 7       | CXCL1, CXCL2, CXCL3, CXCL8, ICAM1, SELE, TNF                                                                                                                                                |
| Cell death of hepatocytes                                                                                                                                       | 1.50E-06 | 6       | CXCL3, IL10, IL6, SMAD3, TGFB1, TNF                                                                                                                                                         |
| Pathway                                                                                                                                                         | Pathway  | Pathway | Pathway                                                                                                                                                                                     |
| <b>Cell-To-Cell Signaling and Interaction, Cellular Growth and Proliferation, Hematological System Development and Function</b>                                 |          |         |                                                                                                                                                                                             |
| Stimulation of blood cells                                                                                                                                      | 1.93E-19 | 13      | CAMP, CCL2, CCL20, CSF2, CXCL3, CXCL8, FGF2, FN1, IL10, IL6, SMAD3, TGFB1, TNF                                                                                                              |
| Stimulation of myeloid cells                                                                                                                                    | 1.68E-18 | 10      | CAMP, CCL20, CSF2, CXCL3, CXCL8, FN1, IL10, IL6, TGFB1, TNF                                                                                                                                 |
| Stimulation of leukocytes                                                                                                                                       | 1.16E-17 | 12      | CAMP, CCL2, CCL20, CSF2, CXCL3, CXCL8, FN1, IL10, IL6, SMAD3, TGFB1, TNF                                                                                                                    |
| Stimulation of connective tissue cells                                                                                                                          | 5.55E-14 | 7       | CSF2, FGF2, IL10, IL6, TGFB1, TNF, VEGFA                                                                                                                                                    |
| <b>Cell-To-Cell Signaling and Interaction, Cellular Movement, Hematological System Development and Function, Immune Cell Trafficking, Inflammatory Response</b> |          |         |                                                                                                                                                                                             |
| Cell movement of monocytes                                                                                                                                      | 1.37E-31 | 19      | CAMP, CCL2, CCL20, CSF2, CXCL3, CXCL8, DEFB1, DEFB103A/DEFB103B, FN1, ICAM1, IL10, IL6, S100A12, S100A7, SELE, SMAD3, TGFB1, TNF, VEGFA                                                     |
| Cell movement of phagocytes                                                                                                                                     | 1.04E-29 | 25      | CAMP, CCL2, CCL20, CSF2, CXCL1, CXCL2, CXCL3, CXCL8, DEFB1, DEFB103A/DEFB103B, DEFB4A/DEFB4B, FN1, ICAM1, IL10, IL6, S100A12, S100A7, S100A8, S100A9, SELE, SMAD3, SMAD4, TGFB1, TNF, VEGFA |
| Cell movement of myeloid cells                                                                                                                                  | 1.13E-29 | 25      | CAMP, CCL2, CCL20, CSF2, CXCL1, CXCL2, CXCL3, CXCL8, DEFB1, DEFB103A/DEFB103B,                                                                                                              |

|                                               |          |    |                                                                                                                                                                                        |
|-----------------------------------------------|----------|----|----------------------------------------------------------------------------------------------------------------------------------------------------------------------------------------|
|                                               |          |    | DEFB4A/DEFB4B, FN1, ICAM1, IL10, IL6, S100A12, S100A7, S100A8, S100A9, SELE, SMAD3, SMAD4, TGFB1, TNF, VEGFA                                                                           |
| Cell movement of neutrophils                  | 2.01E-28 | 21 | CAMP, CCL2, CSF2, CXCL1, CXCL2, CXCL3, CXCL8, DEFB1, DEFB103A/DEFB103B, DEFB4A/DEFB4B, FN1, ICAM1, IL10, IL6, S100A12, S100A8, S100A9, SELE, SMAD3, TGFB1, TNF                         |
| Cell movement of granulocytes                 | 2.05E-28 | 22 | CAMP, CCL2, CSF2, CXCL1, CXCL2, CXCL3, CXCL8, DEFB1, DEFB103A/DEFB103B, DEFB4A/DEFB4B, FN1, ICAM1, IL10, IL6, S100A12, S100A7, S100A8, S100A9, SELE, SMAD3, TGFB1, TNF                 |
| Cell movement of macrophages                  | 1.21E-25 | 19 | CAMP, CCL2, CSF2, CXCL1, CXCL3, CXCL8, DEFB1, DEFB103A/DEFB103B, DEFB4A/DEFB4B, FN1, ICAM1, IL10, IL6, S100A8, SMAD3, SMAD4, TGFB1, TNF, VEGFA                                         |
| Cell movement of mononuclear leukocytes       | 3.41E-25 | 21 | CAMP, CCL2, CCL20, CSF2, CXCL1, CXCL3, CXCL8, DEFB1, DEFB103A/DEFB103B, DEFB4A/DEFB4B, FN1, ICAM1, IL10, IL6, S100A12, S100A7, SELE, SMAD3, TGFB1, TNF, VEGFA                          |
| Cell movement of tumor cell lines             | 2.23E-24 | 25 | CAMP, CCL2, CCL20, CSF2, CXCL1, CXCL2, CXCL3, CXCL8, DEFB103A/DEFB103B, DEFB4A/DEFB4B, FGF1, FGF2, FN1, IL6, PIGF, S100A7, S100A8, S100A9, SELE, SMAD3, SMAD4, TGFA, TGFB1, TNF, VEGFA |
| Cell movement of T lymphocytes                | 1.13E-21 | 16 | CAMP, CCL2, CCL20, CXCL1, CXCL8, DEFB1, DEFB103A/DEFB103B, DEFB4A/DEFB4B, FN1, ICAM1, IL10, IL6, S100A7, SELE, TGFB1, TNF                                                              |
| Cell movement of colorectal cancer cell lines | 1.03E-19 | 13 | CAMP, CCL20, CXCL8, DEFB4A/DEFB4B, FGF2, IL6, S100A8, S100A9, SELE, SMAD4, TGFB1, TNF, VEGFA                                                                                           |
| Cell movement of carcinoma cell lines         | 4.63E-19 | 15 | CAMP, CCL2, CSF2, CXCL3, CXCL8, FGF1, FGF2, FN1, IL6, PIGF, SELE, SMAD3, TGFA, TGFB1, TNF                                                                                              |
| Cell movement of leukocyte cell lines         | 6.77E-19 | 11 | CCL2, CSF2, CXCL3, CXCL8, DEFB1, DEFB103A/DEFB103B, DEFB4A/DEFB4B, FN1, ICAM1, TNF, VEGFA                                                                                              |
| Cell movement of dendritic cells              | 2.20E-17 | 12 | CCL2, CCL20, CSF2, CXCL8, DEFB1, DEFB103A/DEFB103B, DEFB4A/DEFB4B, ICAM1, IL10, SELE, TGFB1, TNF                                                                                       |
| Cell movement of mast cells                   | 9.53E-17 | 9  | CAMP, CCL2, CXCL8, DEFB1, DEFB103A/DEFB103B, DEFB4A/DEFB4B, ICAM1, SELE, TGFB1                                                                                                         |

|                                         |          |    |                                                                                        |
|-----------------------------------------|----------|----|----------------------------------------------------------------------------------------|
| Cell movement of leukemia cell lines    | 2.35E-16 | 11 | CCL2, CCL20, CSF2, CXCL1, CXCL8, DEFB103A/DEFB103B, FN1, SELE, TGFB1, TNF, VEGFA       |
| Cell movement of epithelial cells       | 2.65E-16 | 11 | CXCL1, CXCL2, CXCL8, FGF2, FN1, ICAM1, IL6, SMAD3, TGFA, TGFB1, TNF                    |
| Cell movement of endothelial cells      | 2.88E-16 | 14 | CAMP, CCL2, CSF2, CXCL1, CXCL8, FGF1, FGF2, FN1, ICAM1, SELE, SMAD3, TGFB1, TNF, VEGFA |
| Cell movement of kidney cell lines      | 3.25E-15 | 10 | CAMP, CCL20, CXCL1, CXCL8, FGF2, FN1, ICAM1, SELE, TGFB1, VEGFA                        |
| Cell movement of cancer cells           | 3.54E-15 | 10 | CCL2, CSF2, CXCL8, FN1, IL6, SELE, TGFA, TGFB1, TNF, VEGFA                             |
| Cell movement of embryonic cell lines   | 3.64E-14 | 10 | CAMP, CCL20, CXCL1, FGF2, FN1, ICAM1, IL6, SELE, TGFB1, TNF                            |
| Cell movement of natural killer cells   | 3.81E-14 | 8  | CCL2, CXCL3, CXCL8, ICAM1, IL10, SELE, TGFB1, TNF                                      |
| Cell movement of endothelial cell lines | 4.44E-14 | 9  | BMP10, CXCL1, CXCL8, FGF2, FN1, SELE, TGFB1, TNF, VEGFA                                |
| Cell movement of hematopoietic cells    | 7.17E-14 | 8  | CCL2, CCL20, CSF2, CXCL8, DEFB103A/DEFB103B, ICAM1, SELE, TNF                          |

**Cell-To-Cell Signaling and Interaction, Cellular Movement, Hematological System Development and Function, Immune Cell Trafficking, Inflammatory Response**

|                              |          |    |                                                                                                                                                |
|------------------------------|----------|----|------------------------------------------------------------------------------------------------------------------------------------------------|
| Recruitment of cells         | 7.85E-29 | 21 | BMP10, CAMP, CCL2, CCL20, CSF2, CXCL1, CXCL2, CXCL3, CXCL8, DEFB4A/DEFB4B, FGF2, FN1, ICAM1, IL10, IL6, S100A8, SELE, SMAD3, TGFB1, TNF, VEGFA |
| Recruitment of blood cells   | 1.69E-27 | 20 | BMP10, CAMP, CCL2, CCL20, CSF2, CXCL1, CXCL2, CXCL3, CXCL8, DEFB4A/DEFB4B, FN1, ICAM1, IL10, IL6, S100A8, SELE, SMAD3, TGFB1, TNF, VEGFA       |
| Recruitment of phagocytes    | 4.77E-26 | 18 | BMP10, CAMP, CCL2, CCL20, CSF2, CXCL1, CXCL2, CXCL3, CXCL8, DEFB4A/DEFB4B, ICAM1, IL10, IL6, S100A8, SELE, SMAD3, TGFB1, TNF                   |
| Recruitment of leukocytes    | 1.05E-25 | 19 | BMP10, CAMP, CCL2, CCL20, CSF2, CXCL1, CXCL2, CXCL3, CXCL8, DEFB4A/DEFB4B, FN1, ICAM1, IL10, IL6, S100A8, SELE, SMAD3, TGFB1, TNF              |
| Recruitment of myeloid cells | 2.57E-25 | 18 | BMP10, CAMP, CCL2, CCL20, CSF2, CXCL1, CXCL2, CXCL3, CXCL8, DEFB4A/DEFB4B, ICAM1, IL10, IL6, S100A8, SELE, SMAD3, TGFB1, TNF                   |
| Recruitment of neutrophils   | 1.37E-24 | 16 | CAMP, CCL2, CCL20, CSF2, CXCL1, CXCL2, CXCL3, CXCL8, DEFB4A/DEFB4B, ICAM1, IL10, IL6, S100A8, SELE, SMAD3, TNF                                 |

|                                                                                                                                              |          |    |                                                                                                                                                    |
|----------------------------------------------------------------------------------------------------------------------------------------------|----------|----|----------------------------------------------------------------------------------------------------------------------------------------------------|
| Recruitment of mononuclear leukocytes                                                                                                        | 1.87E-23 | 14 | BMP10, CAMP, CCL2, CCL20, CSF2, CXCL3, CXCL8, FN1, ICAM1, IL10, IL6, SELE, TGFB1, TNF                                                              |
| Recruitment of lymphatic system cells                                                                                                        | 3.36E-23 | 13 | CCL2, CCL20, CSF2, CXCL3, CXCL8, FN1, ICAM1, IL10, IL6, SELE, TGFB1, TNF, VEGFA                                                                    |
| Recruitment of lymphocytes                                                                                                                   | 4.05E-21 | 12 | CCL2, CCL20, CSF2, CXCL3, CXCL8, FN1, ICAM1, IL10, IL6, SELE, TGFB1, TNF                                                                           |
| Recruitment of monocytes                                                                                                                     | 4.84E-17 | 9  | BMP10, CAMP, CCL2, CCL20, CSF2, CXCL3, CXCL8, ICAM1, TNF                                                                                           |
| Recruitment of T lymphocytes                                                                                                                 | 7.02E-16 | 9  | CCL2, CCL20, CSF2, CXCL3, CXCL8, ICAM1, IL10, SELE, TNF                                                                                            |
| <b>Cell-To-Cell Signaling and Interaction, Cellular Movement, Immune Cell Trafficking</b>                                                    |          |    |                                                                                                                                                    |
| Attraction of neutrophils                                                                                                                    | 2.02E-16 | 7  | CAMP, CCL2, CXCL1, CXCL3, CXCL8, TGFB1, TNF                                                                                                        |
| Attraction of antigen presenting cells                                                                                                       | 1.14E-13 | 6  | CAMP, CCL2, CCL20, CSF2, TGFB1, TNF                                                                                                                |
| <b>Cell-To-Cell Signaling and Interaction, Hematological System Development and Function, Immune Cell Trafficking</b>                        |          |    |                                                                                                                                                    |
| Adhesion of phagocytes                                                                                                                       | 3.76E-26 | 16 | CCL2, CSF2, CXCL1, CXCL2, CXCL3, CXCL8, FN1, ICAM1, IL10, IL6, S100A8, S100A9, SELE, TGFB1, TNF, VEGFA                                             |
| Adhesion of myeloid cells                                                                                                                    | 1.59E-25 | 16 | CCL2, CSF2, CXCL1, CXCL2, CXCL3, CXCL8, FN1, ICAM1, IL10, IL6, S100A8, S100A9, SELE, TGFB1, TNF, VEGFA                                             |
| Adhesion of neutrophils                                                                                                                      | 4.23E-25 | 14 | CSF2, CXCL1, CXCL2, CXCL3, CXCL8, FN1, ICAM1, IL6, S100A8, S100A9, SELE, TGFB1, TNF, VEGFA                                                         |
| Adhesion of immune cells                                                                                                                     | 5.19E-23 | 18 | CAMP, CCL2, CCL20, CSF2, CXCL1, CXCL2, CXCL3, CXCL8, FN1, ICAM1, IL10, IL6, S100A8, S100A9, SELE, TGFB1, TNF, VEGFA                                |
| Adhesion of monocytes                                                                                                                        | 3.54E-15 | 8  | CCL2, CXCL8, FN1, ICAM1, IL10, SELE, TGFB1, TNF                                                                                                    |
| Adhesion of mononuclear leukocytes                                                                                                           | 1.13E-14 | 10 | CCL2, CCL20, CXCL8, FN1, ICAM1, IL10, IL6, SELE, TGFB1, TNF                                                                                        |
| Adhesion of endothelial cells                                                                                                                | 3.89E-14 | 10 | CCL2, CXCL1, CXCL2, CXCL8, FN1, ICAM1, SELE, TGFB1, TNF, VEGFA                                                                                     |
| <b>Cell-To-Cell Signaling and Interaction, Hematological System Development and Function, Immune Cell Trafficking, Inflammatory Response</b> |          |    |                                                                                                                                                    |
| Activation of phagocytes                                                                                                                     | 3.70E-27 | 21 | CAMP, CCL2, CCL20, CSF2, CXCL1, CXCL3, CXCL8, DEFB4A/DEFB4B, FGF1, FN1, ICAM1, IL10, IL6, S100A12, S100A7, S100A8, S100A9, SELE, TGFB1, TNF, VEGFA |

|                                                                                                                     |          |    |                                                                                                                                                                                     |
|---------------------------------------------------------------------------------------------------------------------|----------|----|-------------------------------------------------------------------------------------------------------------------------------------------------------------------------------------|
| Activation of leukocytes                                                                                            | 8.51E-27 | 24 | CAMP, CCL2, CCL20, CSF2, CXCL1, CXCL3, CXCL8, DEFB4A/DEFB4B, FGF1, FGF2, FN1, ICAM1, IL10, IL6, S100A12, S100A7, S100A8, S100A9, SELE, SMAD3, SMAD4, TGFB1, TNF, VEGFA              |
| Activation of cells                                                                                                 | 7.96E-26 | 26 | CAMP, CCL2, CCL20, CSF2, CXCL1, CXCL2, CXCL3, CXCL8, DEFB4A/DEFB4B, FGF1, FGF2, FN1, ICAM1, IL10, IL6, S100A12, S100A7, S100A8, S100A9, SELE, SMAD3, SMAD4, TGFA, TGFB1, TNF, VEGFA |
| Activation of myeloid cells                                                                                         | 2.83E-22 | 18 | CAMP, CCL2, CSF2, CXCL1, CXCL3, CXCL8, FGF1, FN1, ICAM1, IL10, IL6, S100A12, S100A7, S100A8, S100A9, SELE, TGFB1, TNF                                                               |
| Activation of neutrophils                                                                                           | 9.10E-21 | 12 | CAMP, CCL2, CSF2, CXCL1, CXCL3, CXCL8, FN1, IL10, IL6, S100A7, SELE, TNF                                                                                                            |
| Activation of antigen presenting cells                                                                              | 1.09E-19 | 16 | CAMP, CCL2, CCL20, CSF2, CXCL8, DEFB4A/DEFB4B, FGF1, FN1, ICAM1, IL10, IL6, S100A9, SELE, TGFB1, TNF, VEGFA                                                                         |
| Activation of mononuclear leukocytes                                                                                | 6.21E-19 | 17 | CAMP, CCL2, CSF2, CXCL8, FGF1, FGF2, FN1, ICAM1, IL10, IL6, S100A12, S100A9, SMAD3, SMAD4, TGFB1, TNF, VEGFA                                                                        |
| Activation of dendritic cells                                                                                       | 2.62E-18 | 11 | CAMP, CCL2, CCL20, CSF2, CXCL8, DEFB4A/DEFB4B, IL10, IL6, TGFB1, TNF, VEGFA                                                                                                         |
| Activation of lymphocytes                                                                                           | 1.07E-17 | 16 | CAMP, CCL2, CSF2, CXCL8, FGF1, FGF2, FN1, ICAM1, IL10, IL6, S100A9, SMAD3, SMAD4, TGFB1, TNF, VEGFA                                                                                 |
| Activation of macrophages                                                                                           | 3.80E-16 | 13 | CAMP, CCL2, CSF2, CXCL8, FGF1, FN1, ICAM1, IL10, IL6, S100A9, SELE, TGFB1, TNF                                                                                                      |
| Activation of T lymphocytes                                                                                         | 1.27E-14 | 13 | CCL2, CSF2, CXCL8, FGF1, FGF2, FN1, ICAM1, IL10, IL6, SMAD3, SMAD4, TGFB1, TNF                                                                                                      |
| Activation of monocytes                                                                                             | 4.73E-14 | 8  | CAMP, CCL2, CSF2, CXCL8, FN1, IL10, S100A12, TNF                                                                                                                                    |
| <b>Cell-To-Cell Signaling and Interaction, Hematological System Development and Function, Inflammatory Response</b> |          |    |                                                                                                                                                                                     |
| Binding of professional phagocytic cells                                                                            | 1.17E-29 | 19 | CAMP, CCL2, CSF2, CXCL1, CXCL2, CXCL3, CXCL8, FGF1, FGF2, FN1, ICAM1, IL10, IL6, S100A8, S100A9, SELE, TGFB1, TNF, VEGFA                                                            |
| Binding of myeloid cells                                                                                            | 3.52E-29 | 19 | CAMP, CCL2, CSF2, CXCL1, CXCL2, CXCL3, CXCL8, FGF1, FGF2, FN1, ICAM1, IL10, IL6, S100A8, S100A9, SELE, TGFB1, TNF, VEGFA                                                            |
| Binding of leukocytes                                                                                               | 6.08E-26 | 20 | CAMP, CCL2, CCL20, CSF2, CXCL1, CXCL2, CXCL3, CXCL8, FGF1, FGF2, FN1, ICAM1, IL10, IL6, S100A8, S100A9, SELE, TGFB1, TNF, VEGFA                                                     |

|                                                                      |          |    |                                                                                                                        |
|----------------------------------------------------------------------|----------|----|------------------------------------------------------------------------------------------------------------------------|
| Binding of monocytes                                                 | 2.21E-18 | 10 | CCL2, CXCL8, FGF1, FGF2, FN1, ICAM1, IL10, SELE, TGFB1, TNF                                                            |
| Binding of endothelial cells                                         | 3.59E-18 | 13 | CCL2, CXCL1, CXCL2, CXCL8, FGF1, FGF2, FN1, ICAM1, IL6, SELE, TGFB1, TNF, VEGFA                                        |
| Binding of mononuclear leukocytes                                    | 1.13E-16 | 12 | CCL2, CCL20, CXCL8, FGF1, FGF2, FN1, ICAM1, IL10, IL6, SELE, TGFB1, TNF                                                |
| Binding of tumor cell lines                                          | 1.51E-16 | 15 | CAMP, CCL2, CXCL2, CXCL3, CXCL8, FGF2, FN1, ICAM1, IL6, SELE, SMAD3, SMAD4, TGFB1, TNF, VEGFA                          |
| Response of neutrophils                                              | 4.30E-15 | 9  | CAMP, CSF2, CXCL1, CXCL3, CXCL8, FN1, ICAM1, IL10, TNF                                                                 |
| Binding of lymphoma cell lines                                       | 4.85E-15 | 9  | CCL2, CXCL2, CXCL3, FN1, ICAM1, IL6, TGFB1, TNF, VEGFA                                                                 |
| Response of myeloid leukocytes                                       | 5.81E-15 | 10 | CAMP, CSF2, CXCL1, CXCL3, CXCL8, FN1, ICAM1, IL10, S100A9, TNF                                                         |
| Binding of vascular endothelial cells                                | 7.68E-15 | 10 | CCL2, CXCL8, FGF1, FGF2, FN1, ICAM1, SELE, TGFB1, TNF, VEGFA                                                           |
| Response of mononuclear leukocytes                                   | 2.01E-14 | 11 | CAMP, CCL2, CSF2, CXCL8, FN1, ICAM1, IL10, IL6, SMAD3, TGFB1, TNF                                                      |
| <b>Cell-To-Cell Signaling and Interaction, Inflammatory Response</b> |          |    |                                                                                                                        |
| Immune response of cells                                             | 2.70E-18 | 18 | CAMP, CCL2, CCL20, CSF2, CXCL1, CXCL3, CXCL8, FN1, ICAM1, IL10, IL6, S100A12, S100A8, S100A9, SMAD3, TGFB1, TNF, VEGFA |
| Immune response of myeloid cells                                     | 2.85E-17 | 13 | CAMP, CCL2, CSF2, CXCL1, CXCL3, CXCL8, FN1, ICAM1, IL10, IL6, S100A9, TGFB1, TNF                                       |
| Immune response of phagocytes                                        | 8.23E-17 | 13 | CAMP, CCL2, CSF2, CXCL1, CXCL3, CXCL8, FN1, ICAM1, IL10, IL6, S100A9, TGFB1, TNF                                       |
| Immune response of leukocytes                                        | 1.77E-16 | 14 | CAMP, CCL2, CSF2, CXCL1, CXCL3, CXCL8, FN1, ICAM1, IL10, IL6, S100A9, SMAD3, TGFB1, TNF                                |
| Immune response of T lymphocytes                                     | 3.67E-14 | 9  | CAMP, CSF2, CXCL8, FN1, ICAM1, IL10, IL6, TGFB1, TNF                                                                   |
| Immune response of lymphocytes                                       | 4.87E-14 | 9  | CSF2, CXCL8, FN1, ICAM1, IL10, IL6, SMAD3, TGFB1, TNF                                                                  |
| Induction of cells                                                   | 5.10E-14 | 9  | CSF2, CXCL8, FGF2, IL10, IL6, SMAD3, TGFB1, TNF, VEGFA                                                                 |
| <b>Cellular Development, Cellular Growth and Proliferation</b>       |          |    |                                                                                                                        |
| Proliferation of hematopoietic progenitor cells                      | 4.08E-19 | 14 | CCL2, CCL20, CSF2, CXCL2, CXCL3, CXCL8, FGF2, IL10, IL6, S100A9, SMAD4, TGFB1, TNF, VEGFA                              |
| Proliferation of progenitor cells                                    | 1.17E-18 | 15 | CCL2, CCL20, CSF2, CXCL2, CXCL3, CXCL8, FGF2, FN1, IL10, IL6, S100A9, SMAD4, TGFB1, TNF, VEGFA                         |

|                                           |          |    |                                                                                                                    |
|-------------------------------------------|----------|----|--------------------------------------------------------------------------------------------------------------------|
| Proliferation of endothelial cells        | 1.20E-18 | 15 | CAMP, CCL2, CSF2, CXCL1, CXCL8, FGF1, FGF2, FN1, IL10, IL6, S100A8, S100A9, TGFB1, TNF, VEGFA                      |
| Proliferation of cancer cells             | 1.45E-18 | 16 | CSF2, CXCL1, CXCL3, CXCL8, FGF1, FGF2, IL10, IL6, S100A7, S100A9, SMAD3, SMAD4, TGFA, TGFB1, TNF, VEGFA            |
| Proliferation of myeloid progenitor cells | 4.72E-16 | 8  | CCL2, CCL20, CSF2, CXCL3, CXCL8, FGF2, IL6, TNF                                                                    |
| Proliferation of connective tissue cells  | 7.16E-16 | 16 | CCL2, CSF2, CXCL3, CXCL8, FGF1, FGF2, FN1, IL10, IL6, S100A8, S100A9, SMAD3, SMAD4, TGFA, TGFB1, TNF               |
| Proliferation of blood cells              | 8.84E-16 | 18 | CAMP, CCL2, CCL20, CSF2, CXCL2, CXCL3, CXCL8, FGF2, FN1, ICAM1, IL10, IL6, S100A9, SMAD3, SMAD4, TGFB1, TNF, VEGFA |
| Proliferation of synovial cells           | 3.21E-15 | 8  | CCL2, CSF2, FGF2, FN1, IL10, IL6, TGFB1, TNF                                                                       |
| Proliferation of myeloid cells            | 6.24E-15 | 11 | CCL2, CCL20, CSF2, CXCL2, CXCL3, CXCL8, FGF2, IL10, IL6, TGFB1, TNF                                                |
| Proliferation of bone marrow cells        | 3.50E-14 | 9  | CCL2, CCL20, CSF2, CXCL3, CXCL8, FGF2, IL6, TGFB1, TNF                                                             |
| Maturation of cells                       | 5.94E-14 | 13 | CAMP, CCL2, CCL20, CSF2, FGF2, ICAM1, IL10, IL6, SMAD3, SMAD4, TGFB1, TNF, VEGFA                                   |
| Proliferation of lymphatic system cells   | 6.34E-14 | 16 | CAMP, CCL2, CCL20, CSF2, CXCL3, CXCL8, FGF2, FN1, ICAM1, IL10, IL6, SMAD3, SMAD4, TGFB1, TNF, VEGFA                |
| Proliferation of muscle cells             | 7.20E-14 | 13 | BMP10, CCL2, CXCL8, FGF1, FGF2, FN1, IL10, IL6, SMAD3, SMAD4, TGFB1, TNF, VEGFA                                    |
| Proliferation of dermal cells             | 8.12E-14 | 10 | CXCL8, FGF2, FN1, IL10, IL6, S100A8, SMAD3, TGFA, TGFB1, TNF                                                       |
| Proliferation of immune cells             | 9.44E-14 | 16 | CAMP, CCL2, CSF2, CXCL2, CXCL3, CXCL8, FN1, ICAM1, IL10, IL6, S100A9, SMAD3, SMAD4, TGFB1, TNF, VEGFA              |
| Proliferation of liver cells              | 1.87E-11 | 9  | CSF2, CXCL3, FGF1, IL6, SMAD3, TGFA, TGFB1, TNF, VEGFA                                                             |
| Proliferation of hepatocytes              | 6.73E-11 | 8  | CXCL3, FGF1, IL6, SMAD3, TGFA, TGFB1, TNF, VEGFA                                                                   |
| Proliferation of heart cells              | 1.03E-08 | 6  | BMP10, FGF1, FGF2, IL6, TGFB1, TNF                                                                                 |
| Proliferation of hepatic stellate cells   | 1.88E-06 | 4  | IL6, SMAD3, TGFB1, TNF                                                                                             |
| Proliferation of cholangiocytes           | 4.26E-06 | 3  | FGF2, IL6, TGFB1                                                                                                   |
| Proliferation of cardiac fibroblasts      | 5.37E-06 | 3  | FGF2, TGFB1, TNF                                                                                                   |
| Proliferation of cardiomyocytes           | 6.45E-06 | 4  | BMP10, FGF1, FGF2, IL6                                                                                             |



|                                                                                                                                                                                             |          |    |                                                                                                                                                                                                         |
|---------------------------------------------------------------------------------------------------------------------------------------------------------------------------------------------|----------|----|---------------------------------------------------------------------------------------------------------------------------------------------------------------------------------------------------------|
| Proliferation of mesangial cells                                                                                                                                                            | 5.76E-05 | 3  | IL6, TGFB1, TNF                                                                                                                                                                                         |
| Proliferation of tubular cells                                                                                                                                                              | 3.24E-04 | 2  | TGFB1, TNF                                                                                                                                                                                              |
| <b>Cellular Development, Cellular Growth and Proliferation, Hematological System Development and Function, Hematopoiesis, Lymphoid Tissue Structure and Development, Tissue Development</b> |          |    |                                                                                                                                                                                                         |
| Development of endothelial tissue                                                                                                                                                           | 2.99E-21 | 17 | CAMP, CCL2, CSF2, CXCL1, CXCL2, CXCL8, FGF1, FGF2, FN1, IL10, IL6, PIGF, S100A8, S100A9, TGFB1, TNF, VEGFA                                                                                              |
| Development of antigen presenting cells                                                                                                                                                     | 1.67E-14 | 11 | CAMP, CCL2, CSF2, CXCL3, FN1, IL10, IL6, S100A9, TGFB1, TNF, VEGFA                                                                                                                                      |
| <b>Cellular Growth and Proliferation</b>                                                                                                                                                    |          |    |                                                                                                                                                                                                         |
| Angiogenesis                                                                                                                                                                                | 1.74E-23 | 24 | BMP10, CAMP, CCL2, CSF2, CXCL1, CXCL2, CXCL8, FGF1, FGF2, FN1, ICAM1, IL10, IL6, PIGF, S100A12, S100A8, S100A9, SELE, SMAD3, SMAD4, TGFA, TGFB1, TNF, VEGFA                                             |
| Proliferation of vascular cells                                                                                                                                                             | 3.32E-20 | 16 | CAMP, CCL2, CXCL1, CXCL8, FGF1, FGF2, FN1, IL10, IL6, S100A8, S100A9, SMAD3, SMAD4, TGFB1, TNF, VEGFA                                                                                                   |
| Cell proliferation of vascular endothelial cells                                                                                                                                            | 1.21E-18 | 13 | CAMP, CCL2, CXCL1, CXCL8, FGF1, FGF2, FN1, IL6, S100A8, S100A9, TGFB1, TNF, VEGFA                                                                                                                       |
| Formation of vessel                                                                                                                                                                         | 4.90E-14 | 10 | CCL2, CSF2, FGF1, FGF2, FN1, ICAM1, IL6, SELE, TGFB1, VEGFA                                                                                                                                             |
| <b>Cellular Movement, Hematological System Development and Function, Immune Cell Trafficking</b>                                                                                            |          |    |                                                                                                                                                                                                         |
| Cell survival                                                                                                                                                                               | 1.73E-17 | 24 | CAMP, CCL2, CSF2, CXCL1, CXCL2, CXCL3, CXCL8, DEFB103A/DEFB103B, DEFB4A/DEFB4B, FGF1, FGF2, FN1, ICAM1, IL10, IL6, S100A8, S100A9, SELE, SMAD3, SMAD4, TGFA, TGFB1, TNF, VEGFA                          |
| Cell viability                                                                                                                                                                              | 2.74E-15 | 22 | CAMP, CCL2, CSF2, CXCL1, CXCL2, CXCL3, CXCL8, FGF1, FGF2, FN1, ICAM1, IL10, IL6, S100A8, S100A9, SELE, SMAD3, SMAD4, TGFA, TGFB1, TNF, VEGFA                                                            |
| <b>Cellular Movement, Hematological System Development and Function, Immune Cell Trafficking, Inflammatory Response</b>                                                                     |          |    |                                                                                                                                                                                                         |
| Chemotaxis                                                                                                                                                                                  | 4.28E-37 | 27 | CAMP, CCL2, CCL20, CSF2, CXCL1, CXCL2, CXCL3, CXCL8, DEFB1, DEFB103A/DEFB103B, DEFB4A/DEFB4B, FGF2, FN1, ICAM1, IL10, IL6, S100A12, S100A7, S100A8, S100A9, SELE, SMAD3, SMAD4, TGFA, TGFB1, TNF, VEGFA |
| Chemotaxis of leukocytes                                                                                                                                                                    | 1.43E-35 | 24 | CAMP, CCL2, CCL20, CSF2, CXCL1, CXCL2, CXCL3, CXCL8, DEFB1, DEFB103A/DEFB103B,                                                                                                                          |

|                                           |          |    |                                                                                                                                                                            |
|-------------------------------------------|----------|----|----------------------------------------------------------------------------------------------------------------------------------------------------------------------------|
|                                           |          |    | DEFB4A/DEFB4B, FN1, ICAM1, IL10, IL6, S100A12, S100A7, S100A8, S100A9, SELE, SMAD3, TGFB1, TNF, VEGFA                                                                      |
| Chemotaxis of phagocytes                  | 1.14E-33 | 22 | CAMP, CCL2, CCL20, CSF2, CXCL1, CXCL2, CXCL3, CXCL8, DEFB1, DEFB103A/DEFB103B, DEFB4A/DEFB4B, ICAM1, IL10, S100A12, S100A7, S100A8, S100A9, SELE, SMAD3, TGFB1, TNF, VEGFA |
| Chemotaxis of myeloid cells               | 1.24E-33 | 22 | CAMP, CCL2, CCL20, CSF2, CXCL1, CXCL2, CXCL3, CXCL8, DEFB1, DEFB103A/DEFB103B, DEFB4A/DEFB4B, ICAM1, IL10, S100A12, S100A7, S100A8, S100A9, SELE, SMAD3, TGFB1, TNF, VEGFA |
| Chemotaxis of granulocytes                | 2.41E-33 | 20 | CAMP, CCL2, CSF2, CXCL1, CXCL2, CXCL3, CXCL8, DEFB1, DEFB103A/DEFB103B, DEFB4A/DEFB4B, ICAM1, IL10, S100A12, S100A7, S100A8, S100A9, SELE, SMAD3, TGFB1, TNF               |
| Chemotaxis of neutrophils                 | 1.17E-30 | 18 | CAMP, CCL2, CSF2, CXCL1, CXCL2, CXCL3, CXCL8, DEFB1, DEFB103A/DEFB103B, DEFB4A/DEFB4B, ICAM1, S100A12, S100A8, S100A9, SELE, SMAD3, TGFB1, TNF                             |
| Chemotaxis of monocytes                   | 1.26E-30 | 16 | CAMP, CCL2, CCL20, CSF2, CXCL3, CXCL8, DEFB1, DEFB103A/DEFB103B, IL10, S100A12, S100A7, SELE, SMAD3, TGFB1, TNF, VEGFA                                                     |
| Migration of phagocytes                   | 3.76E-30 | 21 | CAMP, CCL2, CCL20, CSF2, CXCL1, CXCL2, CXCL3, CXCL8, DEFB1, DEFB103A/DEFB103B, DEFB4A/DEFB4B, FN1, ICAM1, IL10, IL6, S100A8, S100A9, SELE, TGFB1, TNF, VEGFA               |
| Chemotaxis of mononuclear leukocytes      | 7.28E-30 | 18 | CAMP, CCL2, CCL20, CSF2, CXCL3, CXCL8, DEFB1, DEFB103A/DEFB103B, DEFB4A/DEFB4B, FN1, IL10, S100A12, S100A7, SELE, SMAD3, TGFB1, TNF, VEGFA                                 |
| Cell movement of antigen presenting cells | 3.70E-27 | 21 | CAMP, CCL2, CCL20, CSF2, CXCL1, CXCL3, CXCL8, DEFB1, DEFB103A/DEFB103B, DEFB4A/DEFB4B, FN1, ICAM1, IL10, IL6, S100A8, SELE, SMAD3, SMAD4, TGFB1, TNF, VEGFA                |
| Migration of antigen presenting cells     | 7.22E-25 | 16 | CCL2, CCL20, CSF2, CXCL1, CXCL3, CXCL8, DEFB1, DEFB103A/DEFB103B, DEFB4A/DEFB4B, FN1, ICAM1, IL10, S100A8, SELE, TNF, VEGFA                                                |
| Migration of cells                        | 1.06E-24 | 30 | BMP10, CAMP, CCL2, CCL20, CSF2, CXCL1, CXCL2, CXCL3, CXCL8, DEFB1, DEFB103A/DEFB103B, DEFB4A/DEFB4B, FGF1, FGF2, FN1, ICAM1, IL10, IL6, PIGF, S100A12,                     |

|                                        |          |    |                                                                                                                                                                                              |
|----------------------------------------|----------|----|----------------------------------------------------------------------------------------------------------------------------------------------------------------------------------------------|
|                                        |          |    | S100A7, S100A8, S100A9, SELE, SMAD3, SMAD4, TGFA, TGFB1, TNF, VEGFA                                                                                                                          |
| Migration of mononuclear leukocytes    | 1.47E-23 | 19 | CAMP, CCL2, CCL20, CSF2, CXCL1, CXCL3, CXCL8, DEFB1, DEFB103A/DEFB103B, DEFB4A/DEFB4B, FN1, ICAM1, IL10, IL6, S100A7, SELE, TGFB1, TNF, VEGFA                                                |
| Migration of granulocytes              | 3.19E-23 | 15 | CAMP, CCL2, CSF2, CXCL1, CXCL2, CXCL3, CXCL8, FN1, ICAM1, IL6, S100A8, S100A9, SELE, TGFB1, TNF                                                                                              |
| Migration of neutrophils               | 1.35E-22 | 14 | CAMP, CSF2, CXCL1, CXCL2, CXCL3, CXCL8, FN1, ICAM1, IL6, S100A8, S100A9, SELE, TGFB1, TNF                                                                                                    |
| Transmigration of phagocytes           | 6.34E-21 | 12 | CCL2, CSF2, CXCL1, CXCL2, CXCL3, CXCL8, FN1, ICAM1, IL6, SELE, TGFB1, TNF                                                                                                                    |
| Cellular homeostasis                   | 7.61E-21 | 26 | CAMP, CCL2, CCL20, CSF2, CXCL1, CXCL2, CXCL3, CXCL8, DEFB1, DEFB103A/DEFB103B, DEFB4A/DEFB4B, FGF1, FGF2, FN1, ICAM1, IL10, IL6, PIGF, S100A8, S100A9, SMAD3, SMAD4, TGFA, TGFB1, TNF, VEGFA |
| Migration of monocytes                 | 8.47E-21 | 12 | CCL2, CCL20, CSF2, CXCL8, FN1, ICAM1, IL10, IL6, SELE, TGFB1, TNF, VEGFA                                                                                                                     |
| Migration of macrophages               | 9.77E-21 | 12 | CCL2, CSF2, CXCL1, CXCL3, CXCL8, DEFB1, DEFB103A/DEFB103B, DEFB4A/DEFB4B, FN1, S100A8, TNF, VEGFA                                                                                            |
| Transmigration of leukocytes           | 1.96E-20 | 13 | CCL2, CSF2, CXCL1, CXCL2, CXCL3, CXCL8, FN1, ICAM1, IL6, SELE, TGFB1, TNF, VEGFA                                                                                                             |
| Chemotaxis of lymphocytes              | 5.40E-20 | 12 | CAMP, CCL2, CCL20, CXCL3, CXCL8, DEFB1, DEFB103A/DEFB103B, DEFB4A/DEFB4B, FN1, IL10, S100A7, TGFB1                                                                                           |
| Chemotaxis of T lymphocytes            | 1.44E-19 | 11 | CAMP, CCL2, CCL20, CXCL8, DEFB1, DEFB103A/DEFB103B, DEFB4A/DEFB4B, FN1, IL10, S100A7, TGFB1                                                                                                  |
| Chemotaxis of antigen presenting cells | 9.50E-19 | 12 | CAMP, CCL2, CCL20, CSF2, DEFB1, DEFB103A/DEFB103B, DEFB4A/DEFB4B, ICAM1, IL10, SMAD3, TGFB1, TNF                                                                                             |
| Cellular infiltration                  | 1.16E-18 | 18 | CCL2, CSF2, CXCL2, CXCL3, CXCL8, FGF2, FN1, ICAM1, IL10, IL6, S100A8, S100A9, SELE, SMAD3, SMAD4, TGFB1, TNF, VEGFA                                                                          |
| Mobilization of cells                  | 4.07E-18 | 10 | CCL2, CCL20, CSF2, CXCL2, CXCL3, CXCL8, FGF2, SELE, TNF, VEGFA                                                                                                                               |
| Cellular infiltration by phagocytes    | 1.36E-17 | 15 | CCL2, CSF2, CXCL2, CXCL3, CXCL8, ICAM1, IL10, IL6, S100A8, S100A9, SELE, SMAD3, SMAD4, TGFB1, TNF                                                                                            |

|                                                                                                                          |          |    |                                                                                                                                                                                                    |
|--------------------------------------------------------------------------------------------------------------------------|----------|----|----------------------------------------------------------------------------------------------------------------------------------------------------------------------------------------------------|
| Cellular infiltration by myeloid cells                                                                                   | 5.20E-17 | 15 | CCL2, CSF2, CXCL2, CXCL3, CXCL8, ICAM1, IL10, IL6, S100A8, S100A9, SELE, SMAD3, SMAD4, TGFB1, TNF                                                                                                  |
| Migration of leukocyte cell lines                                                                                        | 5.91E-17 | 9  | CCL2, CXCL3, CXCL8, DEFB1, DEFB103A/DEFB103B, DEFB4A/DEFB4B, ICAM1, TNF, VEGFA                                                                                                                     |
| Mobilization of hematopoietic progenitor cells                                                                           | 6.23E-17 | 8  | CCL2, CCL20, CSF2, CXCL2, CXCL3, CXCL8, SELE, VEGFA                                                                                                                                                |
| Migration of vascular cells                                                                                              | 8.23E-17 | 13 | CCL2, CSF2, CXCL1, CXCL8, FGF1, FGF2, FN1, IL6, SELE, SMAD3, TGFB1, TNF, VEGFA                                                                                                                     |
| Cellular infiltration by leukocytes                                                                                      | 2.18E-16 | 16 | CCL2, CSF2, CXCL2, CXCL3, CXCL8, FN1, ICAM1, IL10, IL6, S100A8, S100A9, SELE, SMAD3, SMAD4, TGFB1, TNF                                                                                             |
| Migration of keratinocytes                                                                                               | 1.09E-15 | 9  | CXCL1, CXCL8, FN1, ICAM1, IL6, SMAD3, TGFA, TGFB1, TNF                                                                                                                                             |
| Migration of epithelial cells                                                                                            | 2.50E-15 | 10 | CXCL1, CXCL2, CXCL8, FN1, ICAM1, IL6, SMAD3, TGFA, TGFB1, TNF                                                                                                                                      |
| Migration of endothelial cells                                                                                           | 3.01E-15 | 13 | CCL2, CSF2, CXCL1, CXCL8, FGF1, FGF2, FN1, ICAM1, SELE, SMAD3, TGFB1, TNF, VEGFA                                                                                                                   |
| Transmigration of myeloid cells                                                                                          | 3.36E-15 | 9  | CCL2, CXCL1, CXCL2, CXCL3, CXCL8, FN1, ICAM1, IL6, TNF                                                                                                                                             |
| Mobilization of phagocytes                                                                                               | 3.47E-15 | 7  | CCL2, CCL20, CSF2, CXCL2, CXCL3, CXCL8, TNF                                                                                                                                                        |
| Migration of tumor cells                                                                                                 | 6.81E-15 | 11 | CCL2, CSF2, CXCL1, CXCL8, FN1, IL6, SELE, TGFA, TGFB1, TNF, VEGFA                                                                                                                                  |
| Mobilization of neutrophils                                                                                              | 1.44E-14 | 6  | CCL2, CSF2, CXCL2, CXCL3, CXCL8, TNF                                                                                                                                                               |
| Transmigration of neutrophils                                                                                            | 2.42E-14 | 8  | CXCL1, CXCL2, CXCL3, CXCL8, FN1, ICAM1, IL6, TNF                                                                                                                                                   |
| TH1 immune response of T lymphocytes                                                                                     | 2.60E-14 | 6  | CXCL8, ICAM1, IL10, IL6, TGFB1, TNF                                                                                                                                                                |
| Transendothelial migration of neutrophils                                                                                | 5.55E-14 | 7  | CXCL1, CXCL2, CXCL8, FN1, ICAM1, IL6, TNF                                                                                                                                                          |
| Chemotaxis of dendritic cells                                                                                            | 6.70E-14 | 8  | CCL2, CCL20, DEFB1, DEFB103A/DEFB103B, DEFB4A/DEFB4B, IL10, TGFB1, TNF                                                                                                                             |
| <b>Cellular Movement, Immune Cell Trafficking</b>                                                                        |          |    |                                                                                                                                                                                                    |
| Leukocyte migration                                                                                                      | 1.71E-26 | 26 | BMP10, CAMP, CCL2, CCL20, CSF2, CXCL1, CXCL2, CXCL3, CXCL8, DEFB1, DEFB103A/DEFB103B, DEFB4A/DEFB4B, FN1, ICAM1, IL10, IL6, S100A12, S100A7, S100A8, S100A9, SELE, SMAD3, SMAD4, TGFB1, TNF, VEGFA |
| <b>Hematological System Development and Function, Immune Cell Trafficking, Inflammatory Response, Tissue Development</b> |          |    |                                                                                                                                                                                                    |

|                                                                                                |          |    |                                                                                                                                                                                                  |
|------------------------------------------------------------------------------------------------|----------|----|--------------------------------------------------------------------------------------------------------------------------------------------------------------------------------------------------|
| Accumulation of leukocytes                                                                     | 3.18E-23 | 17 | CCL2, CSF2, CXCL1, CXCL2, CXCL3, CXCL8, FGF1, FGF2, ICAM1, IL10, IL6, S100A8, S100A9, SELE, TGFB1, TNF, VEGFA                                                                                    |
| Accumulation of phagocytes                                                                     | 2.49E-21 | 14 | CCL2, CSF2, CXCL1, CXCL2, CXCL3, CXCL8, FGF1, FGF2, IL10, IL6, S100A8, S100A9, TNF, VEGFA                                                                                                        |
| Accumulation of myeloid cells                                                                  | 3.19E-20 | 14 | CCL2, CSF2, CXCL1, CXCL2, CXCL3, CXCL8, FGF1, FGF2, IL10, IL6, S100A8, S100A9, TNF, VEGFA                                                                                                        |
| Accumulation of neutrophils                                                                    | 2.47E-19 | 11 | CCL2, CSF2, CXCL1, CXCL2, CXCL3, CXCL8, IL10, IL6, S100A8, S100A9, TNF                                                                                                                           |
| Accumulation of mononuclear leukocytes                                                         | 5.15E-15 | 10 | CCL2, CSF2, CXCL2, CXCL3, ICAM1, IL6, SELE, TGFB1, TNF, VEGFA                                                                                                                                    |
| <b>Hematological System Development and Function, Inflammatory Response, Tissue Morphology</b> |          |    |                                                                                                                                                                                                  |
| Quantity of phagocytes                                                                         | 9.34E-23 | 19 | CAMP, CCL2, CCL20, CSF2, CXCL2, CXCL8, FGF1, ICAM1, IL10, IL6, PI3, S100A8, S100A9, SELE, SMAD3, TGFA, TGFB1, TNF, VEGFA                                                                         |
| Quantity of neutrophils                                                                        | 1.16E-22 | 16 | CAMP, CCL2, CSF2, CXCL2, FGF1, ICAM1, IL10, IL6, PI3, S100A8, S100A9, SELE, SMAD3, TGFA, TGFB1, TNF                                                                                              |
| Quantity of granulocytes                                                                       | 2.68E-22 | 17 | CAMP, CCL2, CSF2, CXCL2, CXCL8, FGF1, ICAM1, IL10, IL6, PI3, S100A8, S100A9, SELE, SMAD3, TGFA, TGFB1, TNF                                                                                       |
| Quantity of myeloid cells                                                                      | 2.41E-19 | 18 | CAMP, CCL2, CSF2, CXCL2, CXCL8, FGF1, ICAM1, IL10, IL6, PI3, S100A8, S100A9, SELE, SMAD3, TGFA, TGFB1, TNF, VEGFA                                                                                |
| Quantity of leukocytes                                                                         | 5.63E-18 | 20 | CAMP, CCL2, CCL20, CSF2, CXCL1, CXCL2, CXCL8, FGF1, ICAM1, IL10, IL6, PI3, S100A8, S100A9, SELE, SMAD3, TGFA, TGFB1, TNF, VEGFA                                                                  |
| Quantity of cells                                                                              | 1.28E-15 | 23 | CAMP, CCL2, CCL20, CSF2, CXCL1, CXCL2, CXCL8, FGF1, FGF2, FN1, ICAM1, IL10, IL6, PI3, S100A8, S100A9, SELE, SMAD3, SMAD4, TGFA, TGFB1, TNF, VEGFA                                                |
| Quantity of dendritic cells                                                                    | 1.22E-13 | 9  | CAMP, CCL2, CCL20, CSF2, IL10, PI3, TGFB1, TNF, VEGFA                                                                                                                                            |
| <b>Inflammatory Response</b>                                                                   |          |    |                                                                                                                                                                                                  |
| Inflammatory response                                                                          | 9.34E-29 | 26 | CAMP, CCL2, CCL20, CSF2, CXCL1, CXCL2, CXCL3, CXCL8, DEFB1, DEFB103A/DEFB103B, DEFB4A/DEFB4B, FGF1, FGF2, FN1, ICAM1, IL10, IL6, S100A12, S100A7, S100A8, S100A9, SELE, SMAD3, TGFB1, TNF, VEGFA |
| Invasion of cells                                                                              | 4.64E-21 | 23 | CAMP, CCL2, CSF2, CXCL1, CXCL2, CXCL8, DEFB103A/DEFB103B, FGF1, FGF2, FN1, ICAM1,                                                                                                                |

|                                         |          |    |                                                                                                                          |
|-----------------------------------------|----------|----|--------------------------------------------------------------------------------------------------------------------------|
|                                         |          |    | IL10, IL6, S100A12, S100A7, S100A8, S100A9, SMAD3, SMAD4, TGFA, TGFB1, TNF, VEGFA                                        |
| Proinflammatory response                | 4.92E-15 | 7  | CCL2, CXCL3, CXCL8, IL10, IL6, TNF, VEGFA                                                                                |
| Innate immune response                  | 5.94E-14 | 10 | CAMP, CXCL1, CXCL8, FN1, IL10, IL6, RNASE7, S100A12, SMAD3, TNF                                                          |
| <b>Tissue Development</b>               |          |    |                                                                                                                          |
| Healing of wound                        | 1.53E-20 | 13 | CSF2, FGF1, FGF2, FN1, ICAM1, IL10, IL6, SMAD3, SMAD4, TGFA, TGFB1, TNF, VEGFA                                           |
| Development of epithelial tissue        | 1.69E-20 | 18 | CAMP, CCL2, CSF2, CXCL1, CXCL2, CXCL8, FGF1, FGF2, FN1, IL10, IL6, PIGF, S100A8, S100A9, SMAD4, TGFB1, TNF, VEGFA        |
| Wound                                   | 6.95E-20 | 14 | CAMP, CSF2, FGF1, FGF2, FN1, ICAM1, IL10, IL6, SMAD3, SMAD4, TGFA, TGFB1, TNF, VEGFA                                     |
| Growth of epithelial tissue             | 4.41E-19 | 19 | CAMP, CCL2, CSF2, CXCL1, CXCL3, CXCL8, FGF1, FGF2, FN1, IL10, IL6, S100A8, S100A9, SMAD3, SMAD4, TGFA, TGFB1, TNF, VEGFA |
| Proliferation of epithelial cells       | 3.78E-17 | 16 | CAMP, CSF2, CXCL3, CXCL8, FGF1, FGF2, FN1, IL10, IL6, S100A8, SMAD3, SMAD4, TGFA, TGFB1, TNF, VEGFA                      |
| Formation of skin                       | 5.42E-16 | 13 | CAMP, CSF2, FGF2, FN1, IL10, IL6, S100A7, S100A8, SMAD3, TGFA, TGFB1, TNF, VEGFA                                         |
| Cell-mediated response of T lymphocytes | 2.36E-15 | 8  | CSF2, CXCL8, FN1, ICAM1, IL10, IL6, TGFB1, TNF                                                                           |
| Cell proliferation of fibroblasts       | 5.66E-15 | 13 | CCL2, CSF2, CXCL3, FGF1, FGF2, FN1, IL10, IL6, S100A9, SMAD3, TGFA, TGFB1, TNF                                           |
| Cell movement of memory T lymphocytes   | 1.10E-14 | 7  | CCL2, CCL20, DEFB1, DEFB103A/DEFB103B, DEFB4A/DEFB4B, ICAM1, TNF                                                         |
